# Supplementary material for: High voltage hybrid organic photovoltaics using a zinc oxide acceptor and a subphthalocyanine donor
Source: Royal Society of Chemistry journal article supplement (doi:10.1039/c4cp02733g), 2014-01-01
Supplement: c4cp02733g1.pdf [file c4cp02733g1.pdf]

## Electronic Supporting Information for the Manuscript

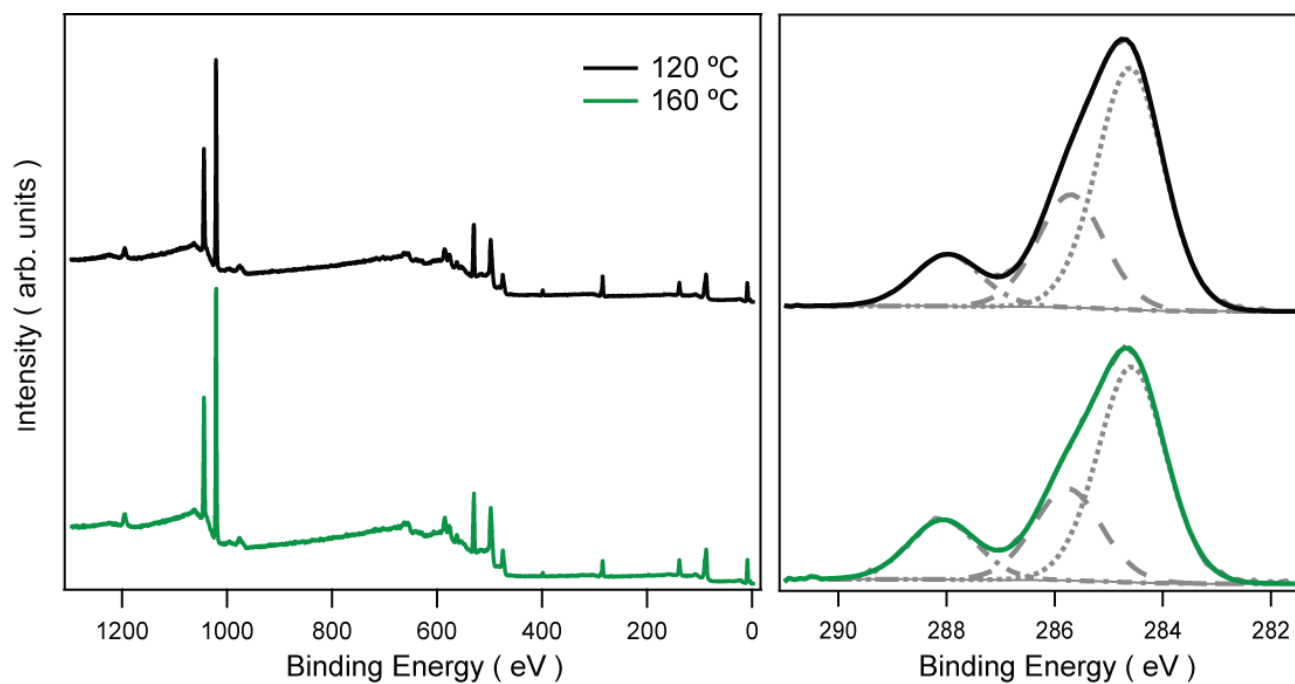

**Figure SI:** XPS spectra showing the survey scan and the C 1s region for the ZnO<sub>120°C</sub> (black solid line) and ZnO<sub>160°C</sub> (green solid line) films.
